1 **Title: Emergence of Multidrug-Resistant Uropathogens harboring ESBL, Carbapenem,**  
2 **Aminoglycosides and AmpC resistant genes from Northern India**

3 Varsha Rani Gajamer<sup>1</sup>, Amitabha Bhattacharjee<sup>2</sup>, Deepjyoti Paul<sup>3</sup>, Birson Ingti<sup>3</sup>, Arunabha Sarkar,  
4 Jyotsna Kapil, Ashish Kumar Singh<sup>1</sup>, Nilu Pradhan<sup>1</sup>, and Hare Krishna Tiwari<sup>4</sup>

5 **Running title:** Multidrug-Resistant Uropathogens in Northern India

6 <sup>1</sup>Senior Research Fellow, Department of Microbiology, Sikkim University, Gangtok, Sikkim, India

7 <sup>2</sup>Assistant Professor, Department of Microbiology, Assam University, Assam, India

8 <sup>3</sup> Research Scholar, Department of Microbiology, Assam University, Assam, India

9 <sup>4</sup>Department of Microbiology, North Bengal Medical College and Neotia Get Well Hospital, Siliguri,  
10 West Bengal, India

11 <sup>5</sup>Department of Microbiology, Sikkim Manipal Institute of Medical Sciences, Gangtok, Sikkim, India.

12 <sup>6</sup>Corresponding author: Associate Professor and Head, Department of Microbiology, Sikkim University,  
13 Gangtok, Sikkim, India

14 Tel- +91-3592-232085; Fax- 251865

15 Email: [hktiware\\_2005@rediffmail.com](mailto:hktiware_2005@rediffmail.com); [hktiware@cus.ac.in](mailto:hktiware@cus.ac.in)

16  
17 **Declarations of interest:** none  
18  
19  
20  
21  
22  
23  
24

## 25 ABSTRACT

26 Extended-spectrum  $\beta$ -lactamase (ESBL) producing bacteria acts as a serious threat, and its co-existence  
27 with other antibiotic resistant gene makes the clinical scenario worse nowadays. Therefore in this study,  
28 we investigated the occurrence of ESBL genes coexisting with carbapenem, AmpC and aminoglycoside  
29 resistance gene in uropathogens. Out of 1516 urine samples, 454 showed significant bacteriuria with a  
30 prevalence rate of 29.94 %. *Escherichia coli* (n=340) were found to be the most predominant  
31 uropathogen followed by *Klebsiella pneumoniae* (n=92), *Pseudomonas aeruginosa* (n=10) and *Proteus*  
32 *mirabilis* (n=9). Among the total uropathogens, sixty-three ESBL-producers were identified which  
33 included *bla*<sub>CTX-M-15</sub> (n=32), followed by *bla*<sub>CTX-M-15</sub> + *bla*<sub>OXA-2</sub> (n=15), *bla*<sub>CTX-M-15</sub> + *bla*<sub>OXA-2</sub> + *bla*<sub>TEM</sub>  
34 (n=6), *bla*<sub>OXA-2</sub> (n=5), *bla*<sub>OXA-2</sub> + *bla*<sub>SHV-76</sub> (n=1), *bla*<sub>TEM+SHV-76</sub> (n= 1) and *bla*<sub>TEM</sub> (n=1). All ESBL  
35 genes were found on plasmid incompatibility types: HI1, I1, FIA+FIB, FIA and Y and were  
36 horizontally transferable. Among 63 ESBL-producers, 59 isolates harboured carbapenem-resistant genes  
37 which included *bla*<sub>NDM-5</sub> (n=48), *bla*<sub>NDM-5</sub> + *bla*<sub>OXA-48</sub> (n=5), *bla*<sub>NDM-5</sub> + *bla*<sub>IMP</sub> (n=5) and *bla*<sub>NDM-5</sub> +  
38 *bla*<sub>IMP</sub> + *bla*<sub>VIM</sub> (n=1). The ESBL producing uropathogens also harbored 16S rRNA methylase genes  
39 which included *rmtB* (n=9), *rmtA* (n=4), *rmtC* (n=1) and *ArmA* (n=1) followed by AmpC genes which  
40 includes CIT (n=8) and DHA-1 (n=1) genes. Imipenem and gentamicin were found to be more effective.  
41 We speculating, this is the first report showing the prevalence of multidrug-resistant uropathogens in  
42 this area demanding regular surveillance for such resistance mechanisms which will be useful for health  
43 personnel to treat ESBL infection and its co-existence with another antibiotic resistance gene.

44 **Keywords:** UTI, Multidrug-Resistant genes, NDM, ESBL, Northern India

45  
46  
47  
48

## 49 INTRODUCTION

50 The rise in the prevalence of antibiotic resistance and the lack of new antibiotic drug development has  
51 gradually reduced the treatment options for bacterial infections (1). Massive use of antibiotics plays a  
52 crucial role in the emergence of antibiotic resistance among gram-negative bacteria worldwide (2). Due  
53 to the huge selective pressure of antibiotics, and the presence of various ESBLs in different countries  $\beta$ -  
54 lactamases are remarkably diversified. Since ESBL genes are mostly plasmid mediated, it may also  
55 carry genes encoding resistance to other class of antibiotics, such as aminoglycosides, macrolides,  
56 chloramphenicol, quinolone or carbapenems. Due to the presence of the multiple resistance genes  
57 encoded in the plasmids, treatment options become restricted for ESBL producing bacteria (3).

58 The emergence and rapid distribution of ESBL producing bacteria which are capable of hydrolyzing  
59 penicillins, broad-spectrum cephalosporins, and monobactams, also harbor resistance genes for other  
60 antibiotics, thus making carbapenem limiting treatment options for infections over the last couple of  
61 decades (4). Carbapenemase-producing *E. coli* are of major clinical concern (5), It has been reported that  
62 carbapenem-resistant Enterobacteriaceae causing mortality by up to 50% of patients who acquire  
63 bloodstream infections (6). As a consequence of this, increased utilization of carbapenems has led to the  
64 emergence of isolates with resistance genes that code for carbapenemases.

65 AmpC harboring strains are challenging as it confers resistance to broad-spectrum cephalosporins which  
66 may further limit treatment option when expressed to higher levels (7). Moreover, aminoglycosides are  
67 commonly used in combination with the  $\beta$ -lactam group of antibiotics for the treatment of severe  
68 infections in hospital patients. However, the bacterial population has developed various mechanisms of  
69 resistance and in a little while, the therapeutic use of this drug will be inadequate (8). Infections due to  
70 ESBL producers with the capacity of antibiotic resistance with other precious antibiotics like  
71 carbapenem, and aminoglycosides makes the treatment challenging. Therefore, the timely detection of  
72 such pathogens is always required to manage the infections with the judicious use of antibiotics.

73 Therefore, the present work was conducted, to study the emergence of ESBL genes in uropathogens,  
74 their co-existence with carbapenem-resistant genes followed by AmpC and Aminoglycoside resistant  
75 genes in Northern India.

## 76 **MATERIAL AND METHODS**

### 77 **Sample collection and Isolation**

78 The present study was conducted from May 2014 to September 2016 in the Department of  
79 Microbiology, Sikkim University, Sikkim, India. A total of 1516 non-duplicate urine samples were  
80 collected from UTI suspected female patients of age group 18 to 48. The samples were collected from in-  
81 patient and out-patient departments of tertiary hospitals namely Sikkim Manipal Institute of Medical  
82 Sciences, Gangtok, Sikkim and Neotia Get Wel hospital Siliguri, West Bengal. The standard  
83 microbiological techniques were used for the collection, transportation, and processing of clean-catch  
84 mid-stream samples. The uropathogens were isolated on Cystine Lactose Electrolyte Deficient Agar  
85 (CLED), Hi chrome UTI agar and Mac Conkey agar plate by the semi-quantitative method. Specimens  
86 yielding more than or equal to  $10^5$  cfu/ml of urine were interpreted as significant bacteriuria (9).

### 87 **Identification of uropathogens**

88 All the isolates were identified on the basis of gram staining, colony morphology and standard  
89 biochemical tests. The representative strains were further identified by Vitek 2 instruments (VITEK 2  
90 compact, Biomerieux, Germany) and further confirmed by 16s rDNA sequencing.

### 91 **Antibiotic Susceptibility Testing**

92 Antibiotic susceptibility testing was performed by Kirby-Bauer disk diffusion method on the Muller  
93 Hinton Agar (MHA) as per Clinical Laboratory Standards Institute (CLSI, 2011) guidelines to determine  
94 the drug resistance pattern of different isolated uropathogens (10).

95

96

## 97 **Phenotypic detection of ESBLs**

98 The screening test of the isolates was done using five antibiotics namely cefotaxime, ceftazidime,  
99 ceftriaxone, aztreonam at 1µg/ml and cefpodoxime 4 µg/ml (1 µg/ml for *Proteus mirabilis*) in Mueller  
100 Hinton Agar by agar dilution method. The isolates that showed growth in any of these antibiotic  
101 containing medium was suspected to be ESBL producer and were subjected to a confirmatory test (10).

## 102 **Confirmatory tests for ESBL production –**

103 Isolates considered to be positive for ESBL production by the screening test were subjected to the  
104 Phenotypic confirmatory test using ESBL kit (Himedia, Mumbai) consisting of ceftazidime (30 µg)  
105 (CAZ), ceftazidime + clavulanic acid (30/10 µg) (CAC), cefotaxime (30 µg) (CTX) and cefotaxime +  
106 clavulanic acid (30/10µg) (CEC) (10).

## 107 **Genotypic characterization of resistant genes**

### 108 **DNA Extraction**

109 Total DNA from bacterial samples was collected by the boiling method. The organism was cultured in  
110 5ml Luria Bertani broth. One ml of culture was added to an Eppendorf tube and centrifuged at 10,000  
111 rpm for 5 minutes followed by supernatant was discarded and pellets were resuspended in sterile  
112 distilled water. The culture was heated/boiled at 85°C for 20 mins. The lysis cell was centrifuged at  
113 (10,000 rpm for 10 mins). The supernatant containing DNA was collected (11).

### 114 ***ESBL genes***

115 ESBL genes were detected by multiplex PCR (BioRad, USA) in a total volume of 25 µl containing 23.5  
116 master mix and 1.5 µl of template DNA. For amplification and characterization of *bla*<sub>ESBL</sub>, a set of eight  
117 primers were used namely: *bla*<sub>TEM</sub>, *bla*<sub>CTX-M</sub>, *bla*<sub>SHV</sub>, *bla*<sub>OXA-2</sub>, *bla*<sub>OXA-10</sub>, *bla*<sub>PER</sub>, *bla*<sub>GES</sub> and *bla*<sub>VEB</sub>  
118 (Table 1). Reactions were run under the following conditions: initial denaturation at 94°C for five min,  
119 33 cycles of 94 °C for 35 sec, 51°C for one min, 72°C for one min and the final extension at 72°C for  
120 seven min<sup>8</sup> PCR products were separated by gel electrophoresis on 1 % agarose gel.

### 121 ***Aminoglycoside resistant genes***

122 The emergence of isolates resistant to all clinically important aminoglycosides related to the production  
123 of 16S rRNA methylases is worrisome. Molecular characterization of aminoglycoside-resistant gene was  
124 performed by a multiplex PCR targeting six 16S rRNA methyltransferase genes namely *armA*, *rmtA*,  
125 *rmtB*, *rmtC*, *rmtD*, and *npmA* (12) (Table 2). These genes were characterized by two multiplex PCR  
126 assays and further confirmed by a simplex PCR. Reactions were performed under the following  
127 conditions; initial denaturation at 94°C for 5 min, 34 cycles of 94°C for 30 s, 52°C for 40 s, and 72°C  
128 for 1 min 20 s, and a final extension at 72°C for 7 min. The amplified products were further sequenced  
129 to confirm the presence of the resistant genes.

### 130 ***AmpC gene***

131 Multiplex PCR was performed targeting all the AmpC genes by using a pair of primers as listed in  
132 Table 3. Isolates were investigated for the presence of other AmpC gene families namely; DHA, CIT,  
133 ACC, FOX and EBC (13). PCR amplification was performed using 30 µl of total reaction volume.  
134 Reactions were run under the following conditions: initial denaturation at 95 °C for 2 min, 34 cycles of  
135 95 °C for 15 s, 51 °C for 1 min, 72 °C for 1 min and a final extension at 72 °C for 7 min.

### 136 ***Carbapenem-resistant gene***

137 Carbapenem-resistant genes were detected by multiplex PCR (BioRad, USA) in a total volume of 30 µl.  
138 For amplification and characterization of the carbapenem-resistant gene, a set of nine primers were used  
139 namely *bla<sub>SME</sub>*, *bla<sub>IMI/NMC</sub>*, *bla<sub>KPC</sub>*, *bla<sub>NDM</sub>*, *bla<sub>VIM</sub>*, *bla<sub>IMP</sub>*, and *bla<sub>OXA-23</sub>*, *bla<sub>OXA-48</sub>*, *bla<sub>OXA-58</sub>* (14).  
140 Reactions were performed under the following conditions: Initial denaturation at 94°C for 10 min; 30  
141 cycles of 94°C for 40 sec, 55°C for 40 sec and 72°C for one min; and a final elongation step at 72°C for  
142 seven min. PCR products were separated by gel electrophoresis on 1 % agarose gel.

### 143 **DNA sequence analysis**

144 Total DNA from representative strains of each gene was prepared and purified by procedures of  
145 Upadhaya et al., 2015. (11). Sequencing was performed to identify specific ESBL, AmpC, Carbapenem,  
146 resistant genes. The DNA was sequenced using the dideoxynucleotide chain termination method at Sci  
147 genome, Kakkanad, Cochin, India. The ABI sequence files were assembled, and contigs were prepared  
148 using Codon Code aligner software (CodonCode Aligner 7.0.1.).

149 Nucleotide sequence similarity searches were performed using the National Centre for Biotechnology  
150 Information (NCBI) Basic Local Alignment Search Tool (BLAST) server on the GenBank database.  
151 (15).

### 152 **Plasmid stability test of isolates**

153 Plasmid stability of all *bla* producers as well as their transformants was analyzed by serial passages  
154 method for 110 consecutive days at 1:1000 dilutions in Luria-Bertani broth (Hi-Media, Mumbai, India)  
155 without antibiotic pressure (15). PCR assay was performed to check the presence of *bla* genes in the  
156 isolates after each passage.

### 157 **Plasmid preparation, genetic transferability and incompatibility typing**

158 Bacterial isolates harbouring ESBL genes were cultured in Luria-Bertani broth (Hi-Media, Mumbai,  
159 India) containing 0.25 µg/ml of cefoxitin. After an overnight incubation, plasmids were extracted by  
160 QIAprep Spin Miniprep Kit (Qiagen, Germany). Plasmids of *bla* genes were subjected to transformation  
161 by heat shock method. *E.JM107* was used as a recipient. Transformants were selected on Luria-Bertani  
162 agar with 0.25 µg/ml of cefoxitin, which were then confirmed both by phenotypic as well as by  
163 genotypic method. The plasmids were classified by PCR based replicon typing(15), a total of 18  
164 different replicon types namely FIA, FIB, FIC, HI1, HI2, I1/I $\gamma$ , L/M, N, P, W, T, A/C, K, B/O, X,  
165 Y, F and FIIA were targeted using 5 multiplex and 3 simplex PCR [15].

166

167

## 168 RESULTS

169 Among the 1516 urine samples collected from female patients suspected to have UTI, 454 showed  
170 significant growth (significant bacteriuria) of a single type of microorganism with a prevalence rate of  
171 29.94 %. Among 454 isolates, *E. coli* (n=340) were found to be the most predominant uropathogen  
172 followed by *Klebsiella pneumoniae* (n=92), *Pseudomonas aeruginosa* (n=10) and *Proteus mirabilis*  
173 (n=9).

174 Antibiotic susceptibility test revealed that 60-90% of the isolates showed resistance to ampicillin.  
175 Imipenem and gentamicin were found to be more effective (Fig:1-4). Among 86 isolates that were  
176 phenotypically confirmed as ESBL producers, 63 (n=*E.coli*-47, n= *K. pneumoniae*- 16) isolates showed  
177 the presence of  $\beta$ -lactamase genes by multiplex PCR. Sanger sequencing confirmed the occurrence of  
178 ESBL genes and also revealed its different variants. Four different ESBL gene variants were detected.  
179 *bla*<sub>CTX-M-15</sub> was found to be the more prevalent and some genes were also found in combination like  
180 *bla*<sub>CTX-M-15</sub> + *bla*<sub>OXA-2</sub>, *bla*<sub>CTX-M-15</sub> + *bla*<sub>OXA-2</sub> + *bla*<sub>TEM</sub>, *bla*<sub>OXA-2</sub> + *bla*<sub>SHV-76</sub> and *bla*<sub>TEM</sub>+*bla*<sub>SHV-76</sub>. Among  
181 the 63 ESBL-producing strains, 59 isolates harboured carbapenem-resistant genes which included  
182 *bla*<sub>NDM-5</sub>, *bla*<sub>NDM-5</sub> + *bla*<sub>OXA-48</sub>, and *bla*<sub>NDM-5</sub> + *bla*<sub>IMP</sub> + *bla*<sub>VIM</sub> and *bla*<sub>NDM-5</sub> + *bla*<sub>IMP</sub> (Fig:5-12).

183 CTX-M was present with another coexisting *bla* gene. From plasmid analysis, it was revealed that ESBL  
184 gene was located within the plasmid of approximately 18Kb in size. ESBL gene was found to be  
185 horizontally transferable and the resistance determinant was carried within diverse incompatibility (inc)  
186 group namely HI1, I1, FIA+FIB, FIA and Y types. Nine plasmids had an incompatibility group of  
187 FIA+FIB and Y respectively, followed by HI1 (n=5), FIA (n=4), and I1 (n=3). In the stability analysis,  
188 the above mentioned Inc type harboring ESBL genes showed progressive plasmid loss after 28 passages.  
189 This implicates the specialized adaptation of this plasmid for the survival of host under cephalosporin  
190 stress in both hospitals and in the community.



191 Apart from ESBL and carbapenem-resistant gene the isolates also harbored 16S rRNA methyltransferase  
192 genes (n=15) followed by AmpC genes (n=9). The most prevalent aminoglycoside resistant gene was  
193 found to be *rmt B* and the least prevalent was *rmt C* and *Arm A* (Figure 3). Amp C resistant genes  
194 included *bla<sub>CIT</sub>* (n=*E.coli*-6, *Klebsiella pneumoniae*-2) and *bla<sub>DHA-1</sub>* (n=*E.coli*-1) genes

## 195 Discussion

196 It is reported that ESBLs in Enterobacteriaceae coexists with resistance to other antimicrobial classes  
197 and as such these organisms become multi-drug resistant hence limiting treatment options for infections.  
198 In case of infections caused by ESBL producing bacteria, carbapenems are the antibiotics of choice for  
199 the treatment [20]. However several studies have reported on the emerging resistance to carbapenem  
200 antibiotics due to the increased production of  $\beta$ -lactamases worldwide, which hydrolyze all  $\beta$ -lactam  
201 antibiotics including carbapenems. In the present study 93.65% of the ESBL producing microorganisms  
202 harbored carbapenem-resistant genes (mainly NDM-5), most of the isolates (n=34) were obtained from  
203 community settings. Our prevalence is also much higher than data obtained in studies from Uganda  
204 where only 28.6% of carbapenemase producers were detected among ESBL producing  
205 Enterobacteriaceae.(6). Similarly, a very less prevalence of carbapenemase encoding gene was reported  
206 from Spain with a prevalence rate of 0.04% only (17). *bla<sub>NDM-5</sub>* was found to be more prevalent among  
207 all carbapenemase producing genes.

208 The organisms harboring AmpC beta-lactamase is a major cause of therapeutic failure leaving  
209 cephalosporins inactive along with co-existing mechanism of resistance. Our study revealed a  
210 prevalence of the AmpC producing gene of 14.75% among ESBL producing Enterobacteriaceae. In our  
211 study, we found out that among all the AmpC producers, the genes producing CIT enzymes were more  
212 prevalent mainly in contrary to the study conducted by Jean et al.,2017 where most of the *E.coli*  
213 (11.7%) harbored CMY-2 producing enzyme (18).

214 Aminoglycosides are frequently used in combination with the  $\beta$ -lactam group of antibiotics to treat  
215 severe infections in hospital patients. However, the bacterial population has developed various resistance  
216 mechanisms and very soon the therapeutic use of this drug will be limited. Acquired 16S rRNA  
217 methyltransferases which accounts for high-level and broad-spectrum aminoglycoside resistance have  
218 been reported increasingly among enterobacterial isolates in recent years, often in association with beta-  
219 lactamases, further complicating the management of infections caused by multidrug-resistant isolates  
220 (19). In our study, four different types of 16S rRNA methyltransferase genes have been characterized  
221 which are responsible for aminoglycoside resistance. Among these, *rmtB* (16.39%) was found to be the  
222 most predominant type in this part of India, on the contrary, Wangkheimayum J et al, (2017) found *Rmt*  
223 *C* being predominant in the Eastern part of the India (8). It is reported that 16S rRNA methyltransferases  
224 often coexist with *bla*NDM and *bla*CTX-M genes (20) (8) and our study was not an exception. The  
225 findings that ESBL producing uropathogens co-harbored carbapenem, aminoglycoside and AmpC  
226 resistant genes underscore that India as an epicenter of horizontal transfers of high-level resistance  
227 alleles between Gram-negative bacteria irrespective of community or nosocomial settings [17] [18].  
228 Through this kind of study that has been conducted in this region, we can understand the local  
229 distribution of these ESBL resistant genes and their movement, adaptability, and propagation  
230 under antibiotic exposure in different clinical environmental conditions(23).  
231 Since the study area shares the border of the border with countries like Nepal, Bhutan and Bangladesh a  
232 good number of patients visit these hospitals for treatment purpose. This may be one of the factors for  
233 the acquisition and spread of drug-resistant pathogens among the people of the study area.

## 234 **Conclusion**

235 The current study revealed that the uropathogens primarily carried various types of ESBL, carbapenem,  
236 AmpC and aminoglycoside resistance genes. The emergence of multiple resistance mechanisms in these  
237 isolates makes these pathogens a major challenge in treating infections, by such pathogens as they show

238 huge resistance to commercially available drugs. This situation is alarming and will pose a more  
239 economic burden on the people suffering from such multiple drug-resistant pathogens. In order to curb  
240 the spread of such resistant pathogens, hospitals have to come up with some antibiotic policy after  
241 regular surveillance of such type of bacterial strains.

## 242 **Declarations**

243

244 **Funding:** This research did not receive any specific grant from funding agencies in the public,  
245 commercial, or not-for-profit sectors.

246

247 **Competing Interests:** No, authors declare there is no conflict of interest

248

249 **Ethical Approval:** Ethical clearance for this work was obtained from the Institutional Ethical  
250 Committee, Sikkim University and consent were obtained from community participants in written form.

251

## 252 **Acknowledgment**

253 The authors would like to acknowledge Rajiv Gandhi National Fellowship (UGC fellowship).The  
254 authors' are highly grateful to the participants involved in this study.

255 **References**

- 256 1. Lee C, Cho I, Jeong B, sH Lee. 2013. No Title. *Int J Environ, Res Public Heal*  
257 10:4272–4305.
- 258 2. Singh AK, Das S, Singh S, Gajamer VR, Pradhan N, Lepcha YD, Tiwari HK. 2018.  
259 Prevalence of Antibiotic Resistance in Commensal *Escherichia Coli* among the  
260 Children in Rural Hill Communities of North East India. *bioRxiv* 1–15.
- 261 3. Alyamani EJ, Khiyami AM, Booq RY, Majrashi MA, Bahwerth FS, Rechkina E. 2017.  
262 The occurrence of ESBL-producing *Escherichia coli* carrying aminoglycoside  
263 resistance genes in urinary tract infections in Saudi Arabia. *Ann Clin Microbiol*  
264 *Antimicrob* 16:1.
- 265 4. Shibl A, Al-Agamy M, Memish Z, Senok A, Khader SA, Assiri A. 2013. The  
266 emergence of OXA-48- and NDM-1-positive *Klebsiella pneumoniae* in Riyadh, Saudi  
267 Arabia. *Int J Infect Dis* 17:e1130–e1133.
- 268 5. Gajmer, Varsha Rani; Singh, Ashish Kumar., Tiwari HK. 2018. *E . coli* encoding  
269 blaNDM-5 associated with community-acquired UTI cases with unusual MIC creep  
270 like phenomenon against 5–6.
- 271 6. Okoche D, Asiimwe BB, Katabazi FA, Kato L, Najjuka CF. 2015. Prevalence and  
272 characterization of carbapenem-resistant enterobacteriaceae isolated from Mulago  
273 National Referral Hospital, Uganda. *PLoS One* 10:1–11.
- 274 7. Ingti B, Paul D, Maurya AP, Bora D, Chanda DD, Chakravarty A, Bhattacharjee A.  
275 2017. Occurrence of bla DHA-1 mediated cephalosporin resistance in *Escherichia coli*  
276 and their transcriptional response against cephalosporin stress: a report from India.  
277 *Ann Clin Microbiol Antimicrob* 16:13.
- 278 8. J. W, D. P, D. D, R. N, S. C, D. B, A. C, A. B. 2017. Occurrence of Acquired 16S  
279 rRNA Methyltransferase-Mediated Aminoglycoside Resistance in Clinical Isolates of

- 280 Enterobacteriaceae within a Tertiary Referral Hospital of Northeast India. *Antimicrob*  
281 *Agents Chemother* 61:1–7.
- 282 9. Mackie and Mc Cartney. 1996. *Identification of Bacteria*, 14th ed. Elsevier, London,  
283 United Kingdom.
- 284 10. CLSI. 2014. Clinical and Laboratory Standards Institute: Performance standards for  
285 antimicrobial disk and dilution antimicrobial susceptibility tests for bacteria isolated  
286 from animals. M31- A3. CLSI, Wayne, PA.
- 287 11. Upadhyay S, Hussain A, Mishra S, Maurya AP, Bhattacharjee A JS. 2015. Genetic  
288 environment of plasmid-mediated CTX-M-15 extended-spectrum beta-lactamases  
289 from clinical and foodborne bacteria in North-Eastern India. *PLoS One* 9:10.
- 290 12. Wu Q, Zhang Y, Han L, Sun J, Ni Y, Etoile ML, France E, Ab G, Prmtc DQ. 2009.  
291 Plasmid-Mediated 16S rRNA Methylases in Aminoglycoside-Resistant  
292 Enterobacteriaceae Isolates in Shanghai , China □ *J Antimicrob Chemother* 53:271–272.
- 293 13. Caroline Dallenne<sup>1</sup>, Anaelle Da Costa<sup>1</sup>, Dominique Decré<sup>1,2</sup>, Christine Favier<sup>3</sup> and  
294 Guillaume Arlet<sup>1,4\*</sup>. 2010. *J Antimicrob Chemother* 65:490–  
295 495. [More Content](#) [Submit](#) [Purchase Alerts](#) [About search](#)  
296 [filtersearch](#) [input](#) [Advanced Search](#) [Issue Cover](#) [Volume 65](#) [Issue 3](#) [March 2010](#)  
297 [Article Contents](#) [Abstract](#) [Introduction](#) [Materials and methods](#) [Results and discussion](#)  
298 [Funding](#) [Transparency declarations](#) [Acknowledge](#). *J Antimicrob Chemother* 65:490–
- 299 14. Yong D, Toleman MA, Giske CG, Cho HS, Sundman K, Lee K, Walsh TR. 2009.  
300 Characterization of a new metallo-β-lactamase gene, blaNDM-1, and a novel  
301 erythromycin esterase gene carried on a unique genetic structure in *Klebsiella*  
302 *pneumoniae* sequence type 14 from India. *Antimicrob Agents Chemother* 53:5046–  
303 5054.
- 304 15. Altschul SF, Gish W, Miller W, Myers EW LD. 1990. Basic local alignment search

- 305 tool. *J Mol Biol* 215(3):403–10.
- 306 16. Karuniawati A, Saharman YR, Lestari DC. 2011. Detection of Carbapenemase  
307 Encoding Genes *Acinetobacter baumannii* Isolated from Patients at Intensive Care Unit  
308 Cipto Mangunkusumo Hospital in 2011. *Acta Med Indones* 45:101–106.
- 309 17. Miró E, Agüero J, Larrosa MN, Fernández A, Conejo MC, Bou G, González-López JJ,  
310 Lara N, Martínez-Martínez L, Oliver A, Aracil B, Oteo J, Pascual A, Rodríguez-Baño  
311 J, Zamorano L, Navarro F. 2013. Prevalence and molecular epidemiology of acquired  
312 AmpC  $\beta$ -lactamases and carbapenemases in *Enterobacteriaceae* isolates from 35  
313 hospitals in Spain. *Eur J Clin Microbiol Infect Dis* 32:253–259.
- 314 18. Jean SS, Hsueh PR, Korman T, Ellem J, George N, Coombs G, Ling T, Tsang O,  
315 Balaji V, Mikamo H, Kusachi S, Mizutani T, Kim MJ, Bae IG, Umur NB,  
316 Rajasekaram DG, Taylor S, Roberts S, van der Werff K, Drinkovic D, Lagamayo E,  
317 Mendoza M, Tan TY, Krishnan P, Wang E, Lu PL, Liu CE, Chuang KYC, Yu KW,  
318 Chen YS, Lu MC, Panthuwong S, Kiratisin P, Phoung NTM, Phuong DM, Van NT,  
319 Nga TTT. 2017. Distribution of ESBLs, AmpC  $\beta$ -lactamases and carbapenemases  
320 among *Enterobacteriaceae* isolates causing intra-abdominal and urinary tract infections  
321 in the Asia-Pacific region during 2008-14: Results from the Study for Monitoring  
322 Antimicrobial Resistance Tr. *J Antimicrob Chemother* 72:166–171.
- 323 19. Bartoloni A, Sennati S, Di Maggio T, Mantella A, Riccobono E, Strohmeyer M,  
324 Revollo C, Villagran AL, Pallecchi L, Rossolini GM. 2016. Antimicrobial  
325 susceptibility and emerging resistance determinants (*bla*CTX-M, *rmtB*, *fosA3*) in  
326 clinical isolates from urinary tract infections in the Bolivian Chaco. *Int J Infect Dis*  
327 43:1–6.
- 328 20. Rahman M, Prasad KN, Pathak A, Pati BK, Singh A, Ovejero CM, Ahmad S,  
329 Gonzalez-Zorn B. 2015. RmtC and RmtF 16S rRNA methyltransferase in NDM-1–

- 330 producing *Pseudomonas aeruginosa*. *Emerg Infect Dis* 21:2059–2062.
- 331 21. George A. Jacoby. 2009. AmpC b-lactamases. *Clin Microbiol Rev* 22:161–82.
- 332 22. Li Y, Li Q DY et al. 2008. Prevalence of plasmid-mediated AmpC b-lactamases in a  
333 Chinese university hospital from 2003 to 2005: first report of CMY-2-type AmpC b-  
334 lactamase resistance in China. *J Clin Microbiol* 46:1317–21.
- 335 23. Gajamer VR, Bhattacharjee A, Paul D, Kapil J, Sarkar A, Singh AK, Pradhan N,  
336 Tiwari HK. 2018. The First Report of Phenotypic and Molecular Characterization of  
337 Extended-Spectrum Beta-Lactamase-Producing Uropathogens in Sikkim and  
338 Darjeeling Hills of India. *Microb Drug Resist* 00:mdr.2017.0159.
- 339 24. Bert F. 2002. Identification of PSE and OXA beta-lactamase genes in *Pseudomonas*  
340 *aeruginosa* using PCR-restriction fragment length polymorphism. *J Antimicrob*  
341 *Chemother* 50:11–18.
- 342 25. Lee S, Park YJ, Kim M, Lee HK, Han K, Kang CS, Kang MW. 2005. Prevalence of  
343 Ambler class A and D  $\beta$ -lactamases among clinical isolates of *Pseudomonas*  
344 *aeruginosa* in Korea. *J Antimicrob Chemother* 56:122–127.
- 345 26. Ghajavand H, Esfahani BN, Havaei SA, Moghim S, Fazeli H. 2015. Molecular  
346 identification of *Acinetobacter baumannii* isolated from intensive care units and their  
347 antimicrobial resistance patterns. *Adv Biomed Res*.
- 348 27. Nass T, Vandell L, Sougakoff W, Livermore DM NP. 1998. Cloning and sequence  
349 analysis of the gene for a carbapenem hydrolyzing class A  $\beta$ -lactamase, SME-1, from  
350 *Serratia marcescens* S6. *Antimicrob Agents Chemother* 38:1262–70.
- 351 28. Rasmussen BA, Bush K, Keeney D, Yang Y, Hare R, Gara CO et al. 1996.  
352 Characterization of IMI-1 betalactamase, a class A carbapenem-hydrolyzing enzyme  
353 from *Enterobacter cloacae*. *Antimicrob Agents Chemother* 40:2080–6.

354

**Table 1: Detailed information of primers used in multiplex PCR for detection of *bla* genes in ESBL producers**

| List of primer pairs               | Target                       | Sequence (5'-3')                                 | Product size (bp) | References |
|------------------------------------|------------------------------|--------------------------------------------------|-------------------|------------|
| <b>TEM-F</b><br><b>TEM-R</b>       | TEM                          | ATGAGTATTCAACATTCCG<br>CTGACAGTTACCAATGCTTA      | 867               | [25]       |
| <b>SHV-F</b><br><b>SHV-R</b>       | SHV                          | AGGATTGACTGCCTTTTTG<br>ATTTGCTGATTTGCTCG         | 392               | [26]       |
| <b>CTX-M-F</b><br><b>CTX-M-R</b>   | CTX-M<br>-1, -2, -9<br>Group | CGCTTTGCGATGTGCAG<br>ACCGGATATCGTTGGT            | 550               | [26]       |
| <b>OXA-10-F</b><br><b>OXA-10-R</b> | OXA-<br>2group               | TCAACAAATCGCCAGAGAAG<br>TCCCACA CCAGAAAAACCAG    | 478               | [25]       |
| <b>OXA-2-F</b><br><b>OXA-2-F</b>   | OXA-2                        | AAGAAACGCTACTCGCCTGC<br>CCACTCAACCCATCCTACCC     | 276               | [25]       |
| <b>VEB-F</b><br><b>VEB-R</b>       | PER                          | CATTTCCCGATGCATGCAAAGCGT<br>CGAAGTTTCTTTGGACTCTG | 650               | [26]       |
| <b>GES-F</b><br><b>GES-R</b>       | GES                          | AGTCGGCTAGACCGGAAAG<br>TTTGTCCGTGCTCAGGAT        | 863               | [26]       |
| <b>PER-F</b><br><b>PER-R</b>       | VEB                          | AATTTGGGCTTAGGGCAGAA<br>ATGAATGTCATTATAAAAGC     | 923               | [26]       |



**Table 2: Detailed information of primers used in multiplex PCR for detection of 16S rRNA methyltransferase genes [10]**

| List of primer pairs           | Target | Sequence (5'-3')                                                 | Product size (bp) |
|--------------------------------|--------|------------------------------------------------------------------|-------------------|
| <b>armA-F</b><br><b>armA-R</b> | armA   | F GGTGCGAAAACAGTCGTAGT<br>R TCCTCAAATATCCTCTATGT                 | 1153              |
| <b>rmtA-F</b><br><b>rmtA-R</b> | rmtA-  | F CTAGCGTCCATCCTTTCCTC<br>R TTTGCTTCCATGCCCTTGCC                 | 635               |
| <b>rmtB-F</b><br><b>rmtB-R</b> | rmtB   | F GGAATTCCATATGAACATCAACGATGCC<br>RCCGCTCGAGTCCATTCTTTTTTATCAAGT | 756               |
| <b>rmtC-F</b><br><b>rmtC-R</b> | rmtC   | F CGAAGAAGTAACAGCCAAAG<br>R GCTAGAGTCAAGCCAGAAAA                 | 1000              |
| <b>rmtD-F</b><br><b>rmtD-F</b> | rmtD   | F TCATTTTCGTTTCAGCAC<br>R AAACATGAGCGAACTGAAGG                   | 744               |
| <b>npmA-F</b><br><b>npmA-R</b> | npmA   | F CGGGATCCAAGCACTTTCATACTGACG<br>R CGGAATCCAATTTTGTCTTATTAG      | 981               |

**Table 3: Detailed information of primers used in multiplex PCR for detection of AmpC resistant genes [11]**

| List of primer pairs          | Target                                                                          | Sequence (5'-3')                                | Product size (bp) |
|-------------------------------|---------------------------------------------------------------------------------|-------------------------------------------------|-------------------|
| <b>DHA F</b><br><b>DHA R</b>  | DHA-1 and DHA-2                                                                 | TGATGGCACAGCAGGATATTC<br>GCTTTGACTCTTTCGGTATTCG | 997               |
| <b>CIT F</b><br><b>CIT R</b>  | LAT-1 to LAT-3, BIL-1, CMY-2 to CMY-7,<br>CMY-12 to CMY-18 and CMY-21 to CMY-23 | CGAAGAGGCAATGACCAGAC<br>ACGGACAGGGTTAQGATAQ     | 538               |
| <b>ACC-F</b><br><b>ACC-R</b>  | ACC-1 and ACC-2                                                                 | CACCTCCAGCGACTTGTTAC<br>GTTAQCCAGCATCACGATCC    | 346               |
| <b>FOX-F</b><br><b>FOX-R</b>  | FOX-1 to FOX-5                                                                  | CTACAGTGCGGGTGGTTT<br>CTATTTGCGGCCAGGTGA        | 162               |
| <b>EBC-F</b><br><b>EBC-R</b>  | ACT-1 and MIR-1                                                                 | CGGTAAAGCCGATGTTGCG<br>AGCCTAACCCCTGATACA       | 683               |
| <b>MOX -F</b><br><b>MOX R</b> | MOX-1, MOX-2, CMY-1, CMY-8 to CMY-11 and<br>CMY-19                              | GCAACAACGACAATCCATCCT<br>GGGATAQCGTAACTCTCCCAA  | 895               |

**Table 4: Detailed information of primers used in multiplex PCR for detection of Carbapenem resistant genes**

| List of primer pairs   | Target  | Sequence (5'-3')                                           | Product size (bp) | Reference |
|------------------------|---------|------------------------------------------------------------|-------------------|-----------|
| NDM F<br>NDM R         | NDM     | 5'-GGGCAGTCGCTTCCAACGGT-3'<br>5'-GTAGTGCTCAGTGTCGGCAT-3'   | 476               | [12]      |
| IMP F<br>IMP R         | IMP     | 5'-TTGACACTCCATTACDG-3'<br>5'-GATYGAGAATTAAGCCACYCT-3'     | 139               | [27]      |
| VIM F<br>VIM R         | VIM     | 5'-GATGGTGTTTGGTCGCATA-3'<br>5'-CGAATGCGCAGCACCAG-3'       | 390               | [27]      |
| SME F<br>SME R         | SME     | 5'-AACGGCTTCATTTTTGTTTAG-3'<br>5'-GCTTCCGCAATAGTTTTATCA-3' | 831               | [28]      |
| KPC F<br>KPC R         | KPC     | 5'-CATTCAAGGGCTTTCTTGCTGC-3'<br>5'-ACGACGGCATAGTCATTTGC-3' | 538               | [29]      |
| IMI/NMC F<br>IMI/NMC R | IMI/NMC | 5'-CCATTCACCCATCACAAC-3'<br>5'-CTACCGCATAATCATTTC-3'       | 440               | [29]      |

## **LEGENDS OF FIGURES**

**Fig 1: Resistance pattern of *Escherechia coli* against commonly used antibiotics**

**Fig 2: Resistance pattern of *Klebsiella pneumoniae* against commonly used antibiotics**

**Fig 3: Resistance pattern of *Proteus mirabilis* against commonly used antibiotics**

**Fig 4: Resistance pattern of *Pseudomonas aeruginosa* against commonly used antibiotics**

**Fig 5: Agarose gel showing PCR amplified products of ESBL gene**

Lane M-100bp DNA ladder. Lane 1-*bla*<sub>CTX-M</sub>, Lane 2 -*bla*<sub>CTX-M</sub>, Lane 3-No band, Lane 4- *bla*<sub>TEM+SHV</sub>, Lane 5-*bla*<sub>CTX-M</sub>, Lane 6- *bla*<sub>CTX-</sub>, Lane 7- *bla*<sub>CTX-M</sub>, Lane 8- *bla*<sub>CTX-M+OXA-2</sub>, Lane 9- +ve control (*bla*<sub>CTX-M</sub>), Lane 10- - ve control.

**Fig 6: Agarose gel showing PCR amplified products of Carbapenem-resistant gene**

Lane 1-ve control, Lane 2-+ control, Lane 3,4,5- NDM, Lane-6 No band, Lane 7,8 -NDM Lane 9 NDM+ VIM, Lane 10,11, 12, 13, 14-NDM. Lane M- 1kb Ladder.

**Fig 8a: Agarose gel showing PCR amplified products of 16S rRNA methyltransferase gene**

Lane M- 1kb Ladder Lane 1- - ve control, Lane 2- +ve control Lane 7- Rmt B, Lane 9- Rmt A

**Fig 8b: Agarose gel showing PCR amplified products of 16S rRNA methyltransferase gene**

Lane M- 1kb Ladder Lane 2- Lane 4,- Rmt C, Lane 9- Rmt A, Lane 11- + control, Lane 13-ve control

**Fig 9: Distribution of Carbapenem resistant bacteria in uropathogen**

**Fig 10: Distribution of ESBL resistant bacteria in uropathogen**

**Fig 11: Distribution of 16S rRNA methyltransferase resistant bacteria in uropathogen**

**Fig 12: Distribution of Amp C resistant bacteria in uropathogen**

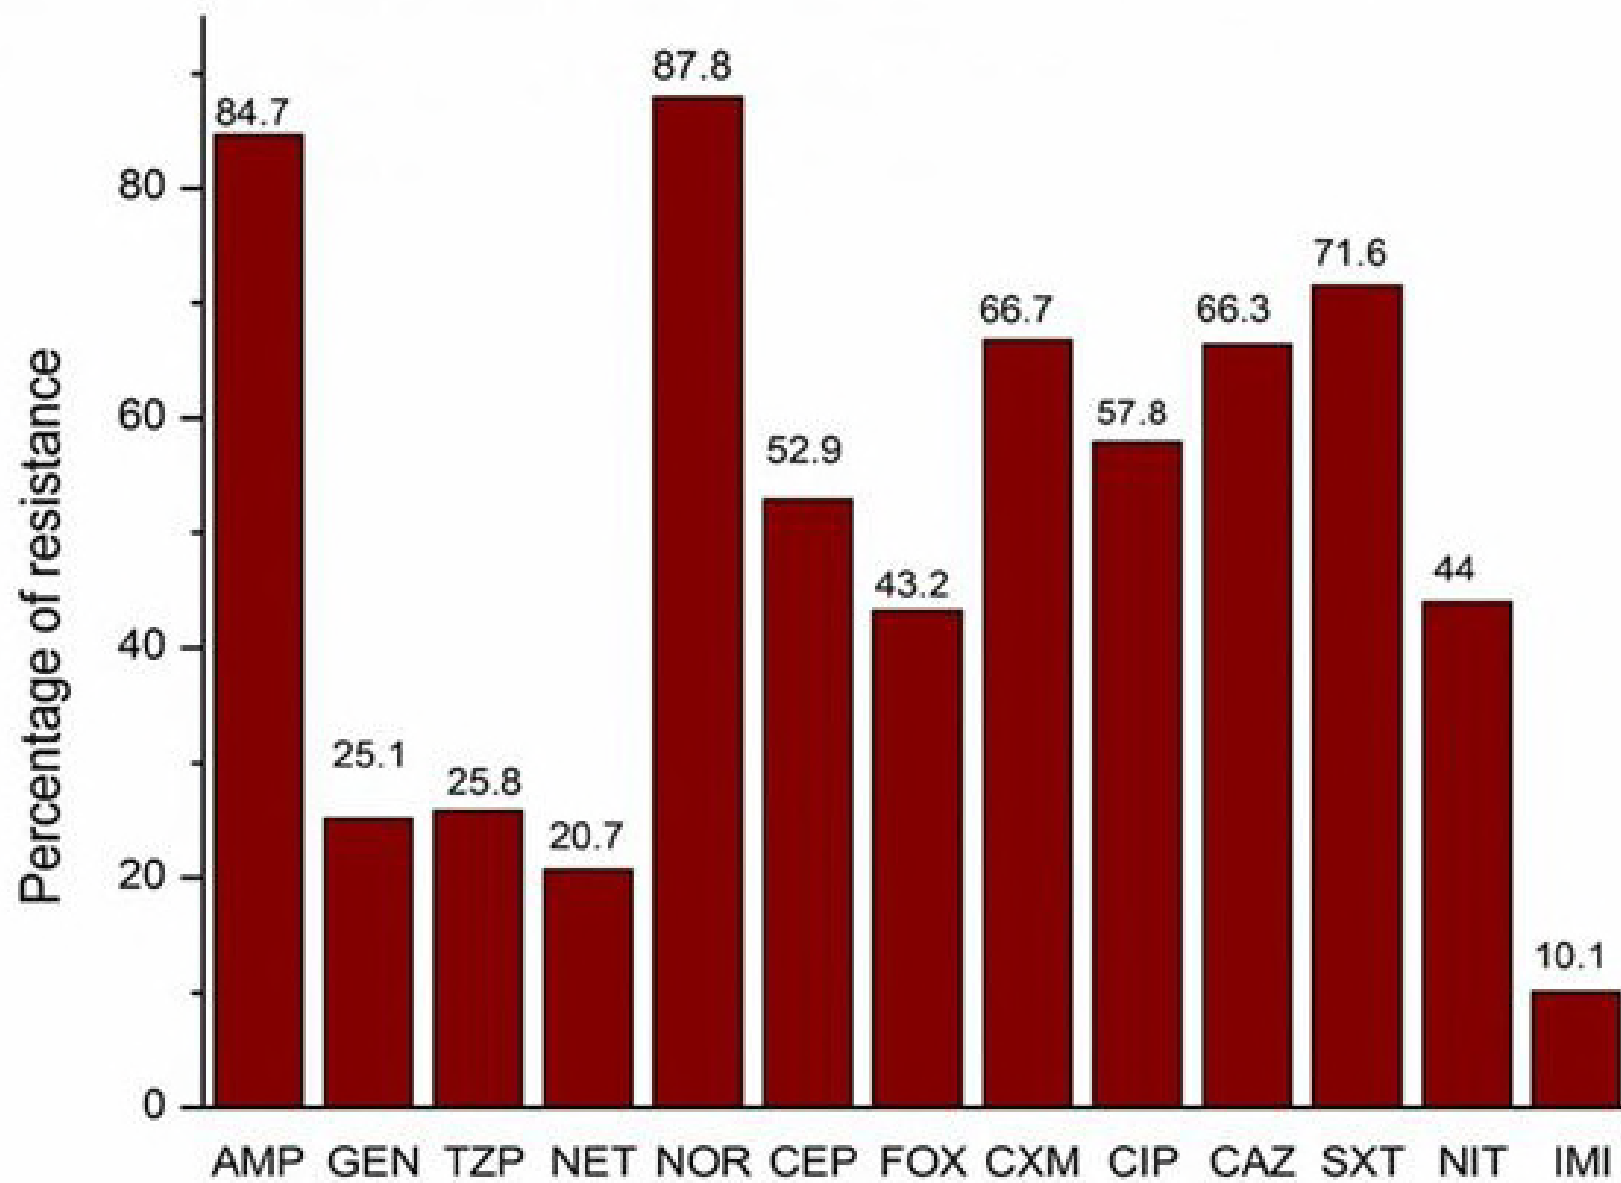

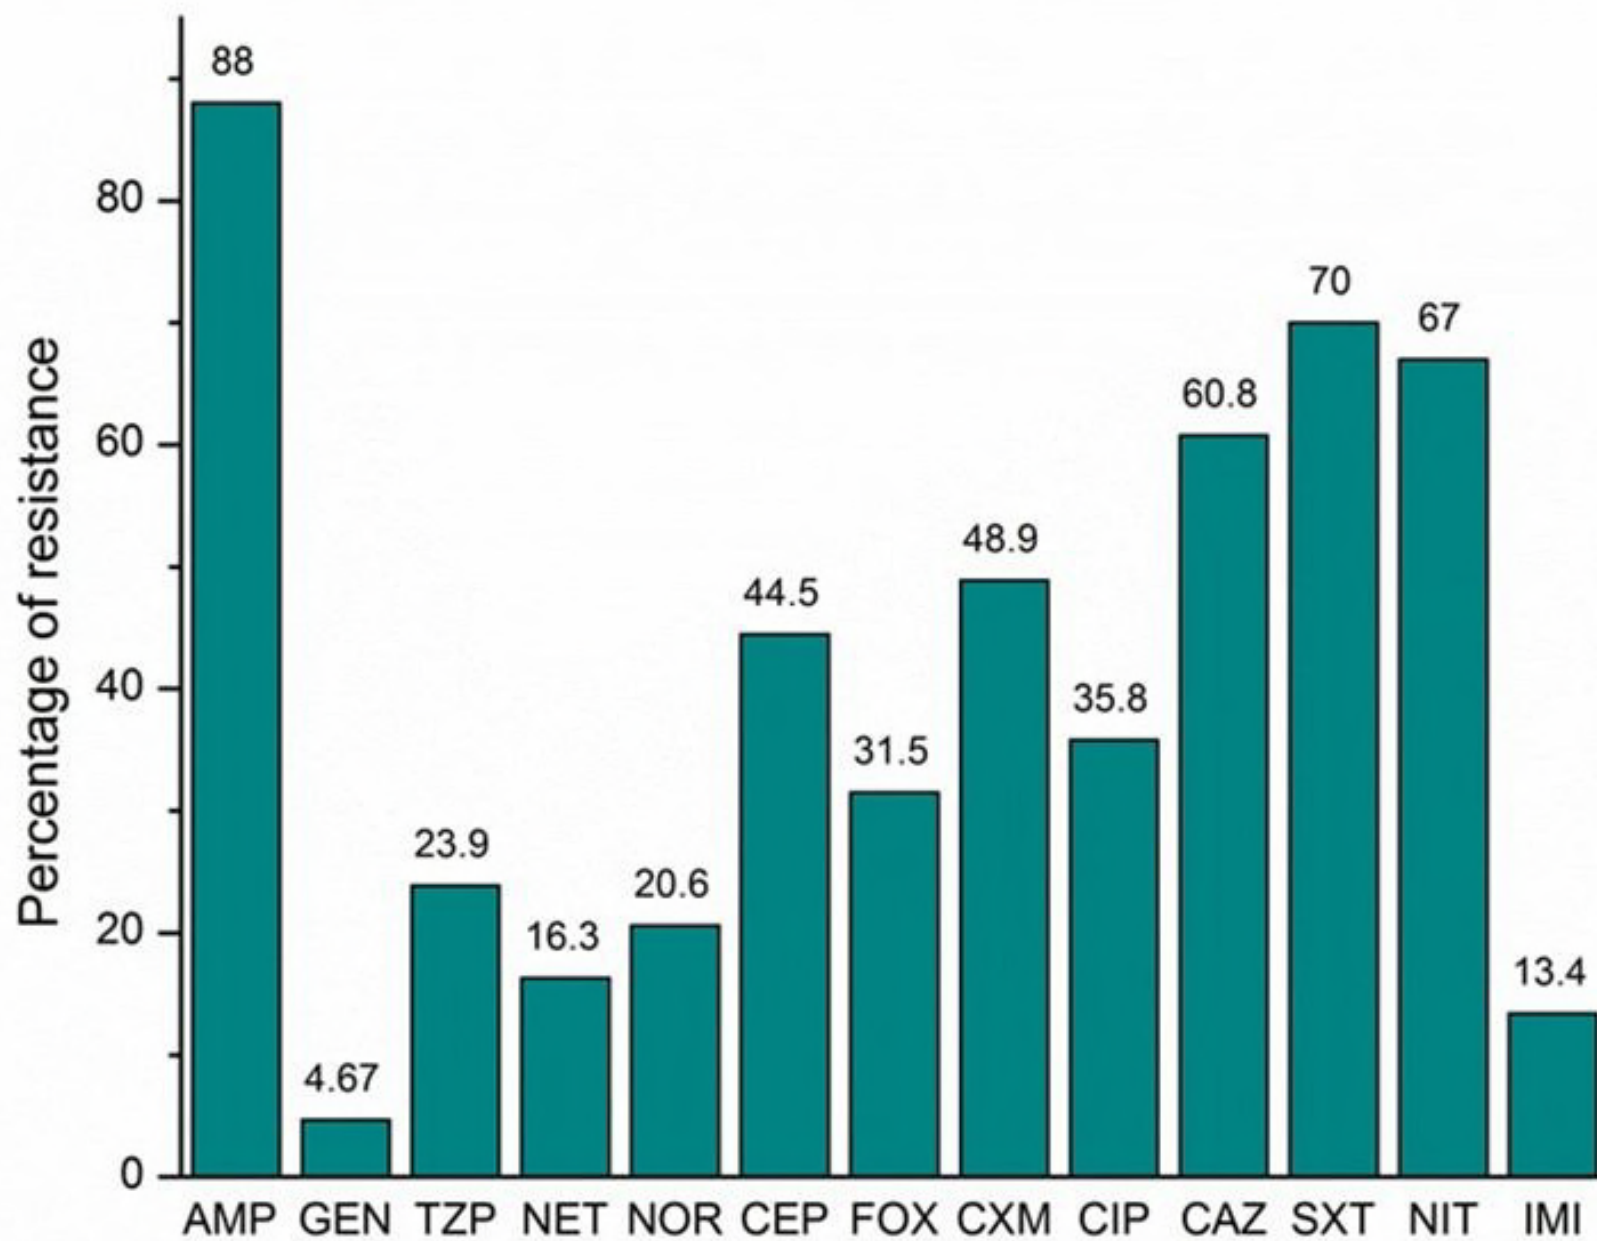

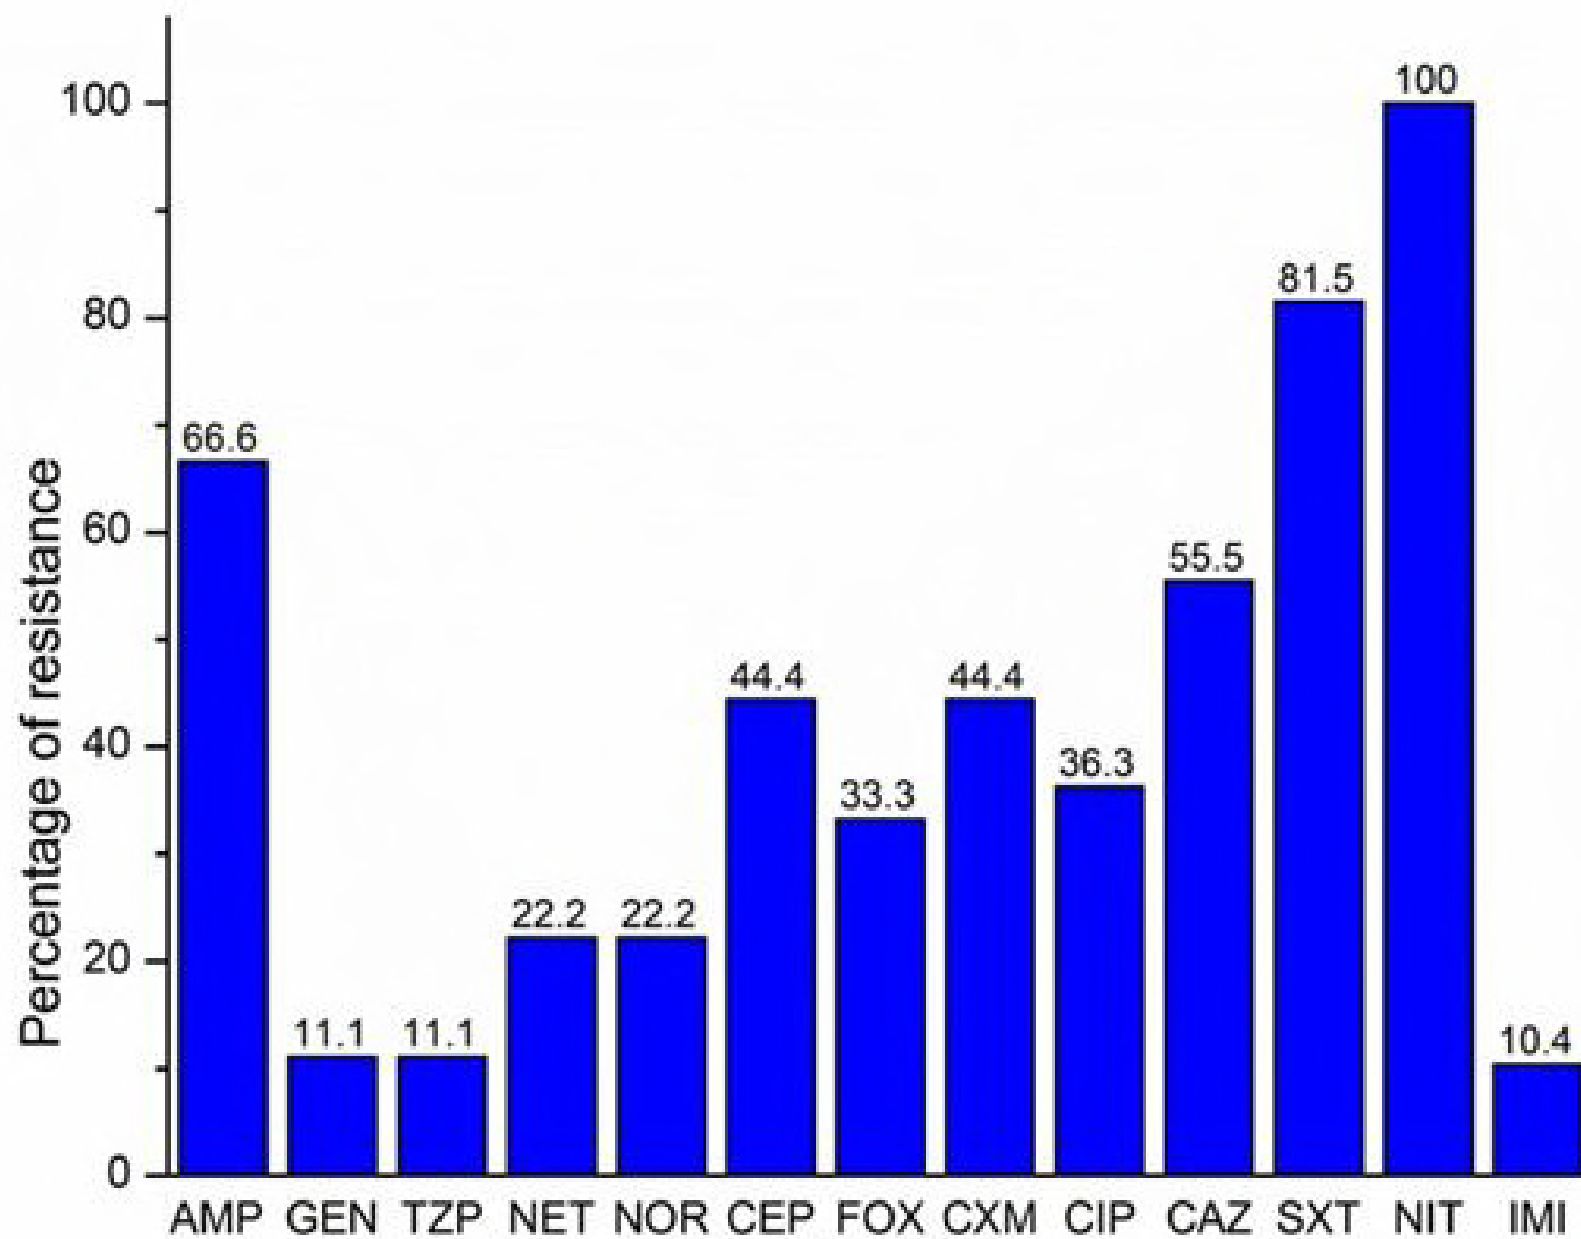

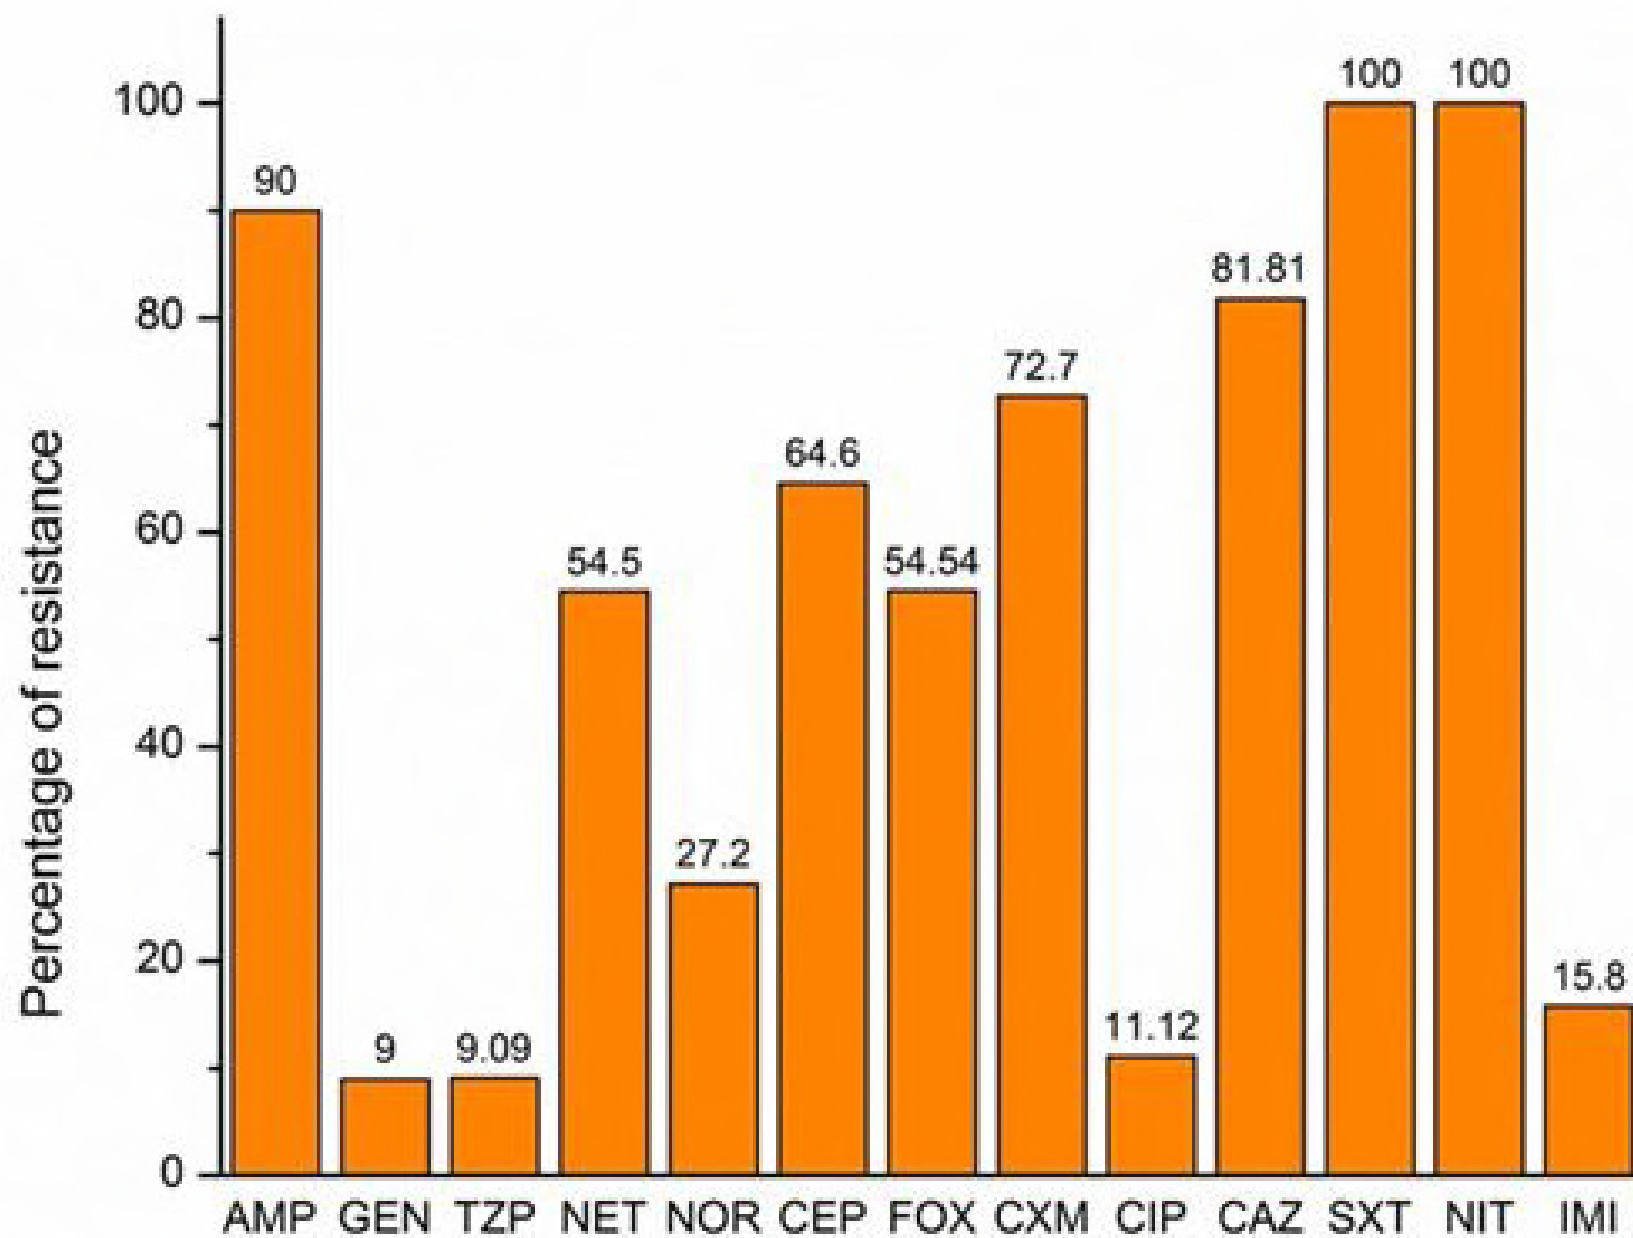

M 1 2 3 4 5 6 7 8 9 10

*bla*<sub>TEM</sub> (867 bp)  
*bla*<sub>CTX-M</sub> (550 bp)  
*bla*<sub>SHV</sub> (392 bp)  
*bla*<sub>OXA-2</sub> (478 bp)

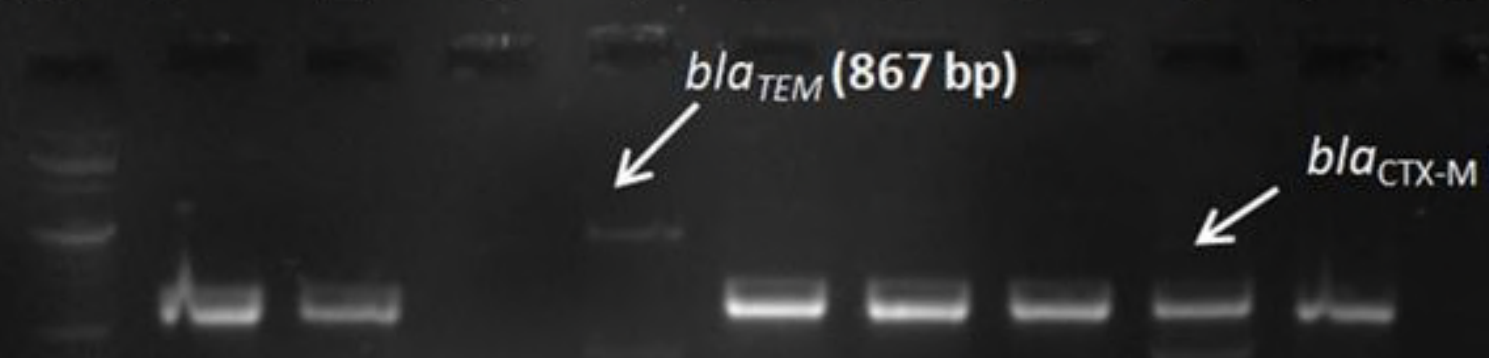



1 2 3 4 5 6 7 8 9 10 11 12 13 14 M

NDM 476 bp

VIM 390bp

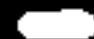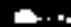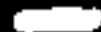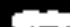

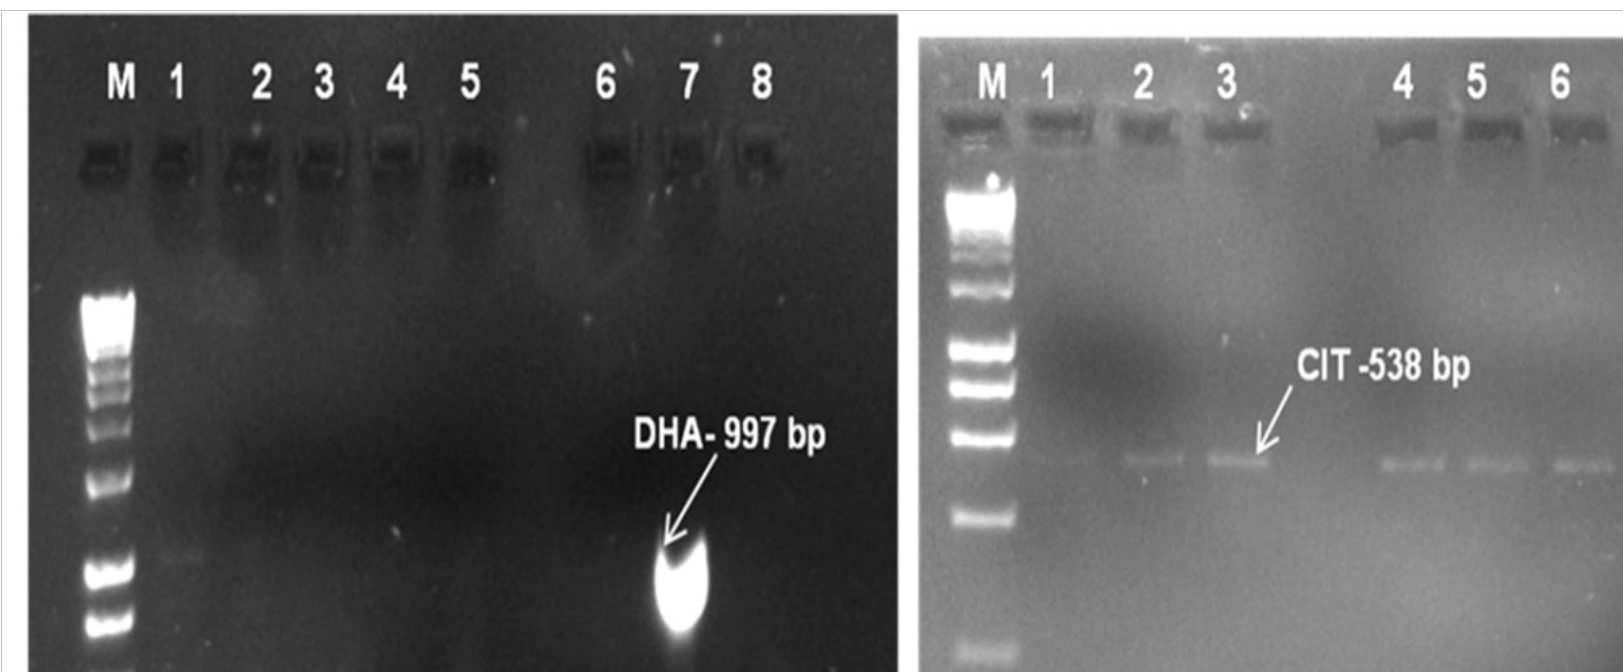

M 1 2 3 4 5 6 7 8 9 10 11 12 13

Rmt B 756 bp

Arm A 1153 bp

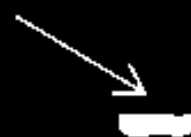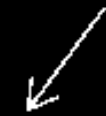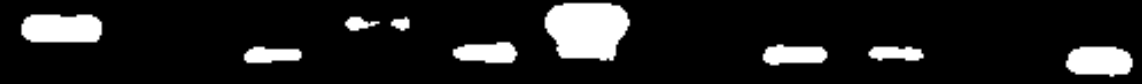

M 1 2 3 4 5 6 7 8 9 10 11 12 13

Rmt C 1000 bp

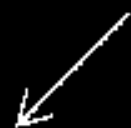

Rmt A 635 bp

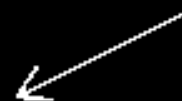

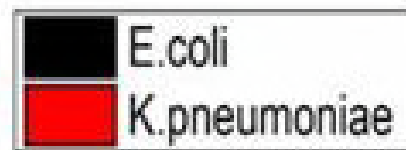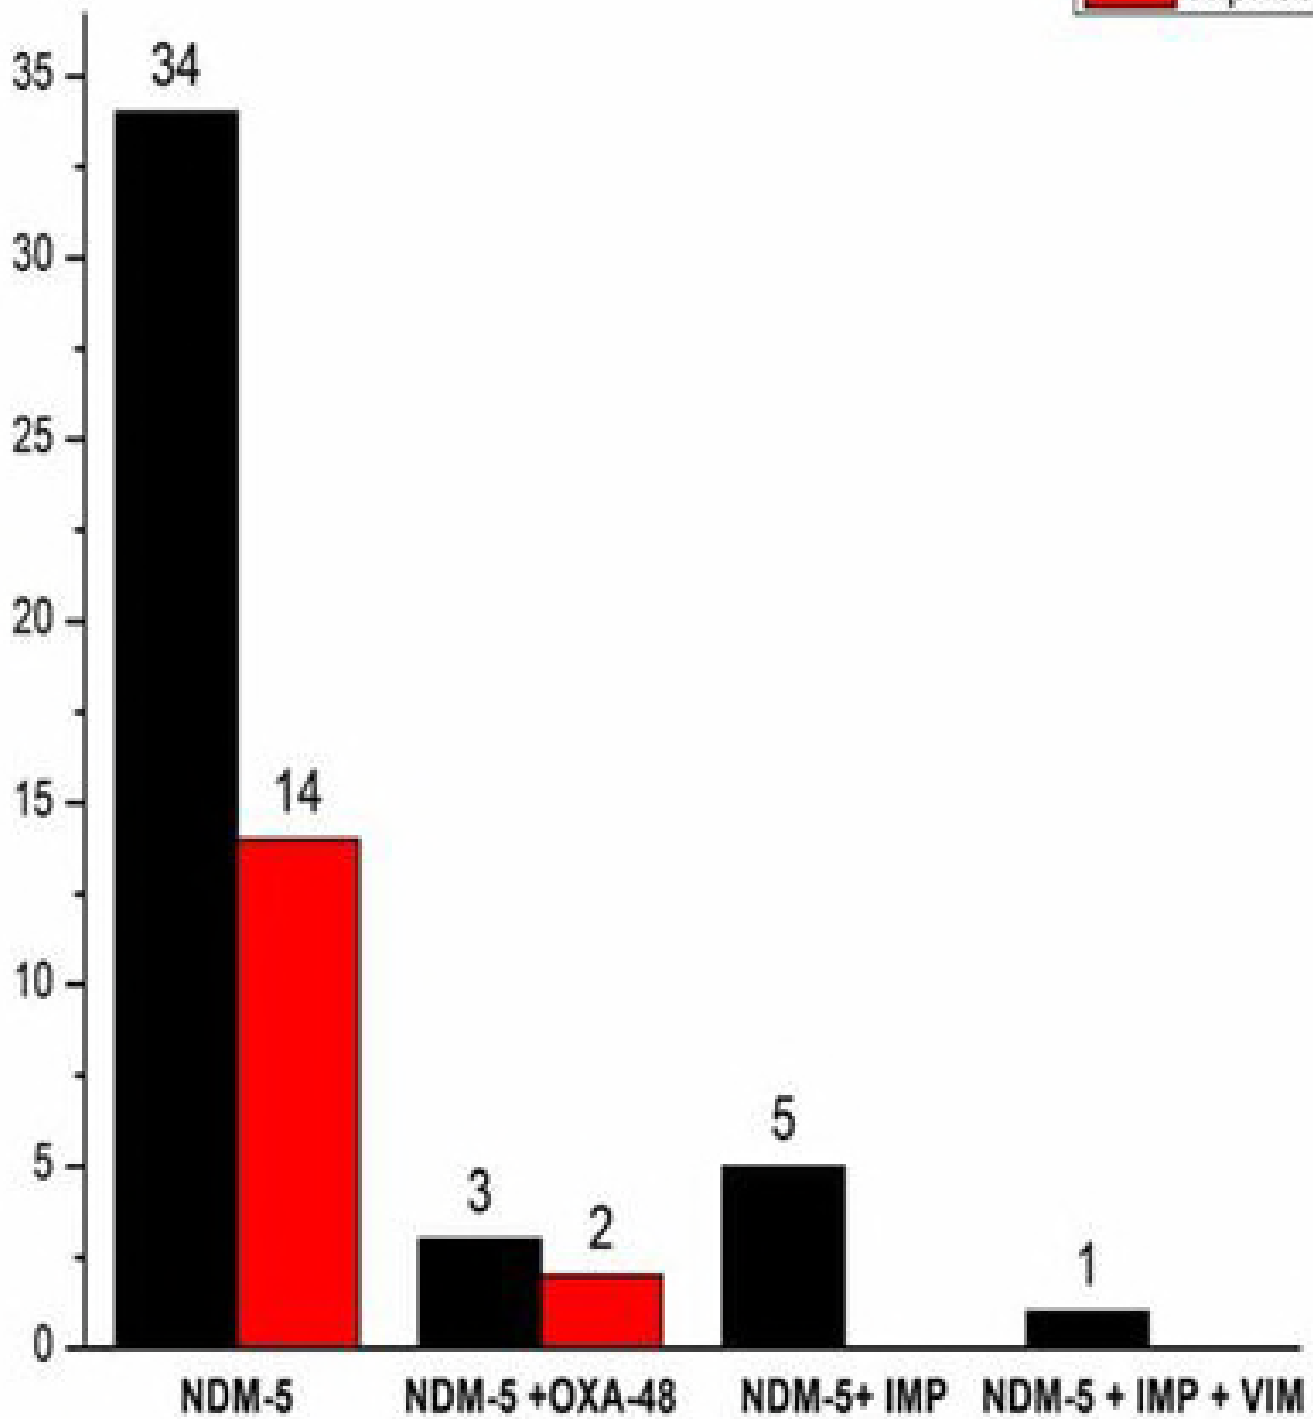

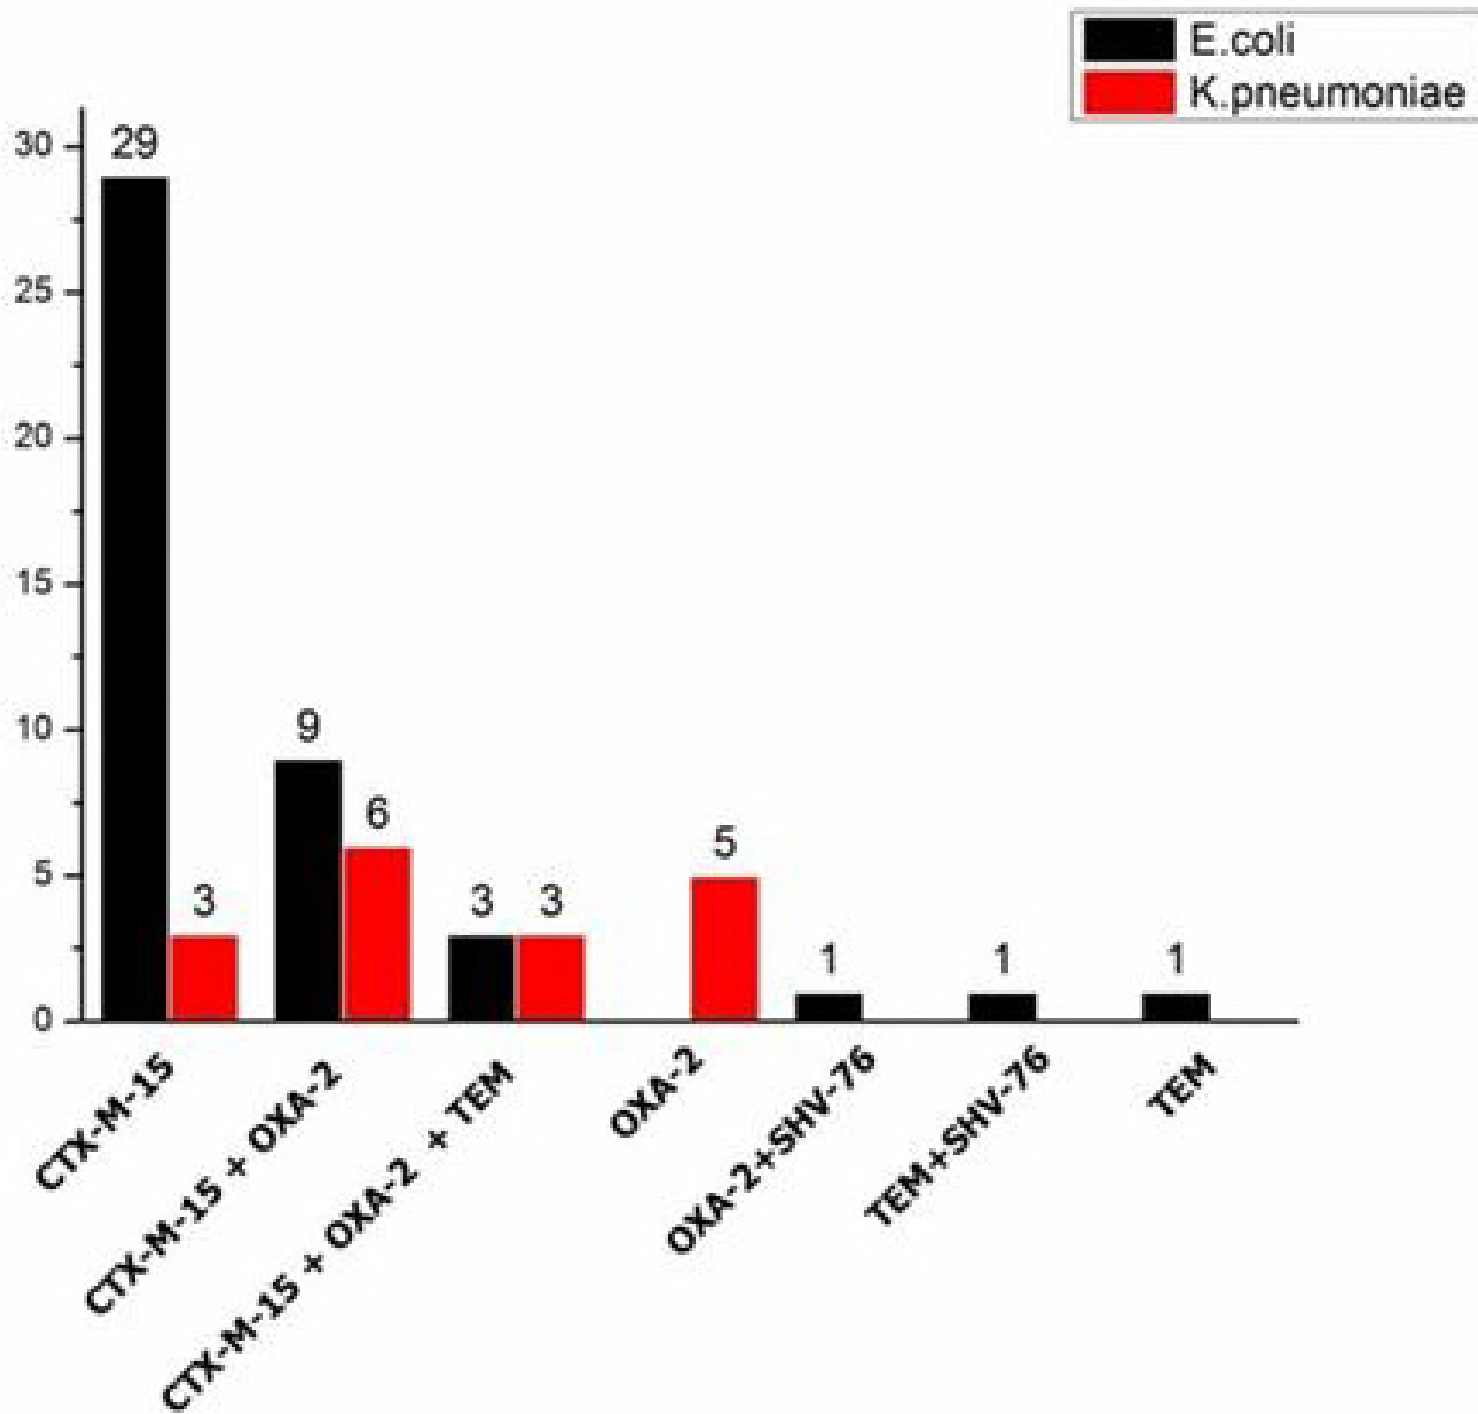

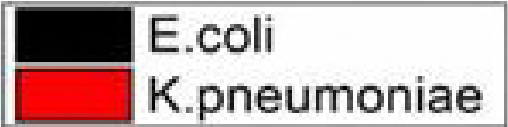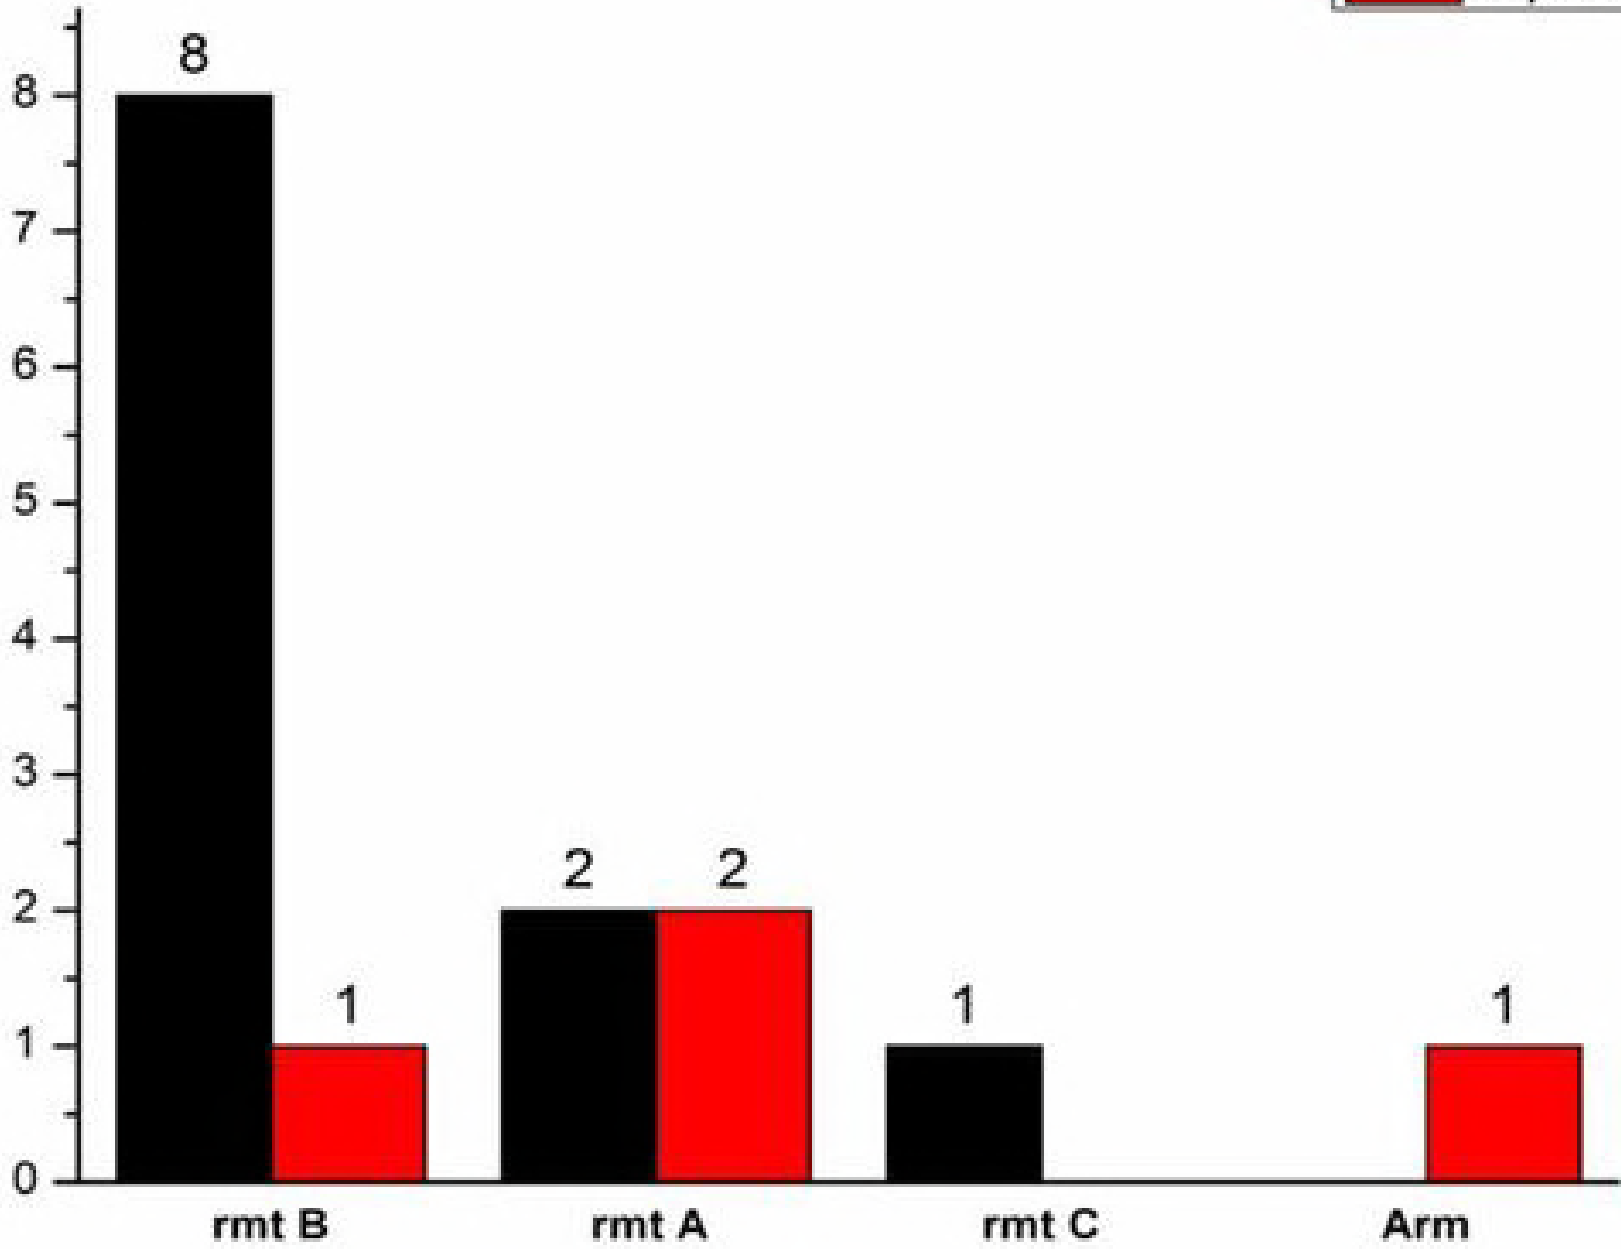

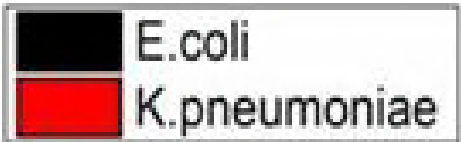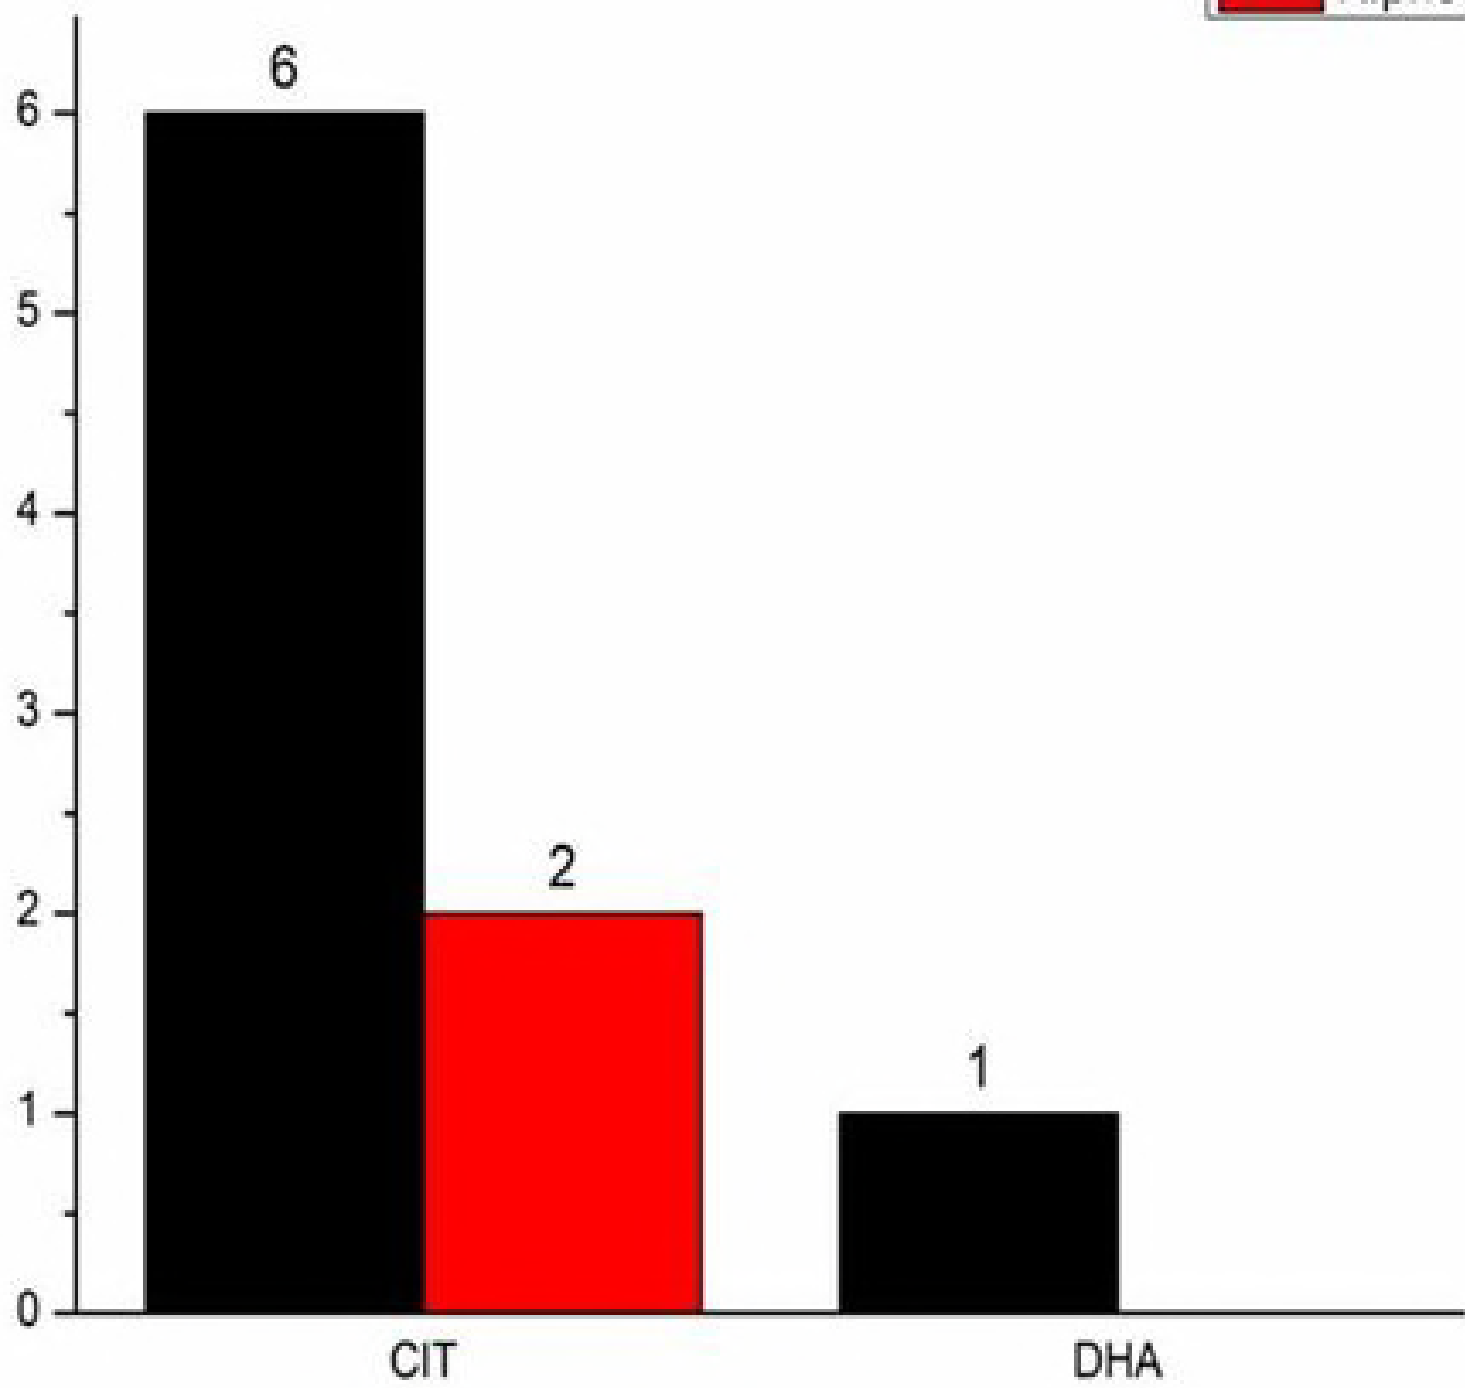

Source: https://www.biorxiv.org/content/biorxiv/early/2018/07/24/375501.full.pdf
